# Supplementary material
Source: PubMed Central journal article supplement (PMC2890044)

Supplementary Figure 1

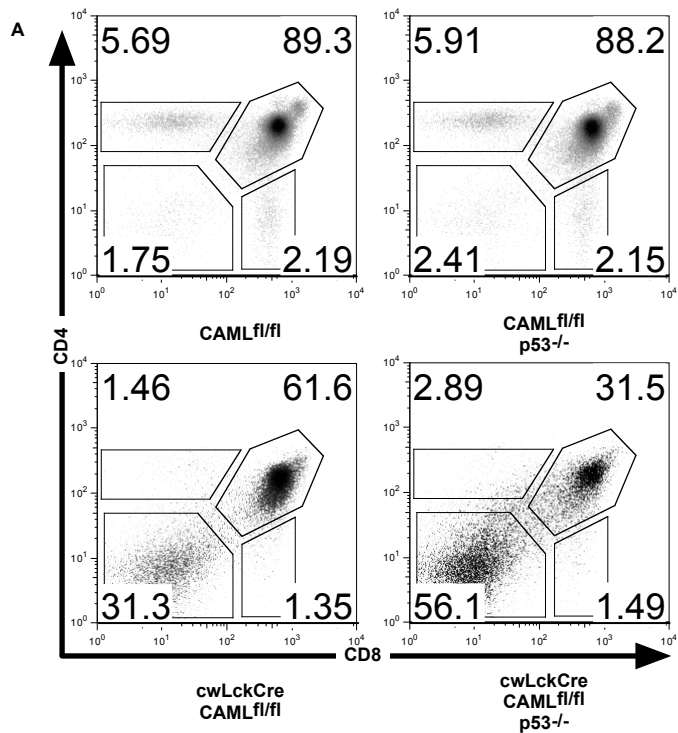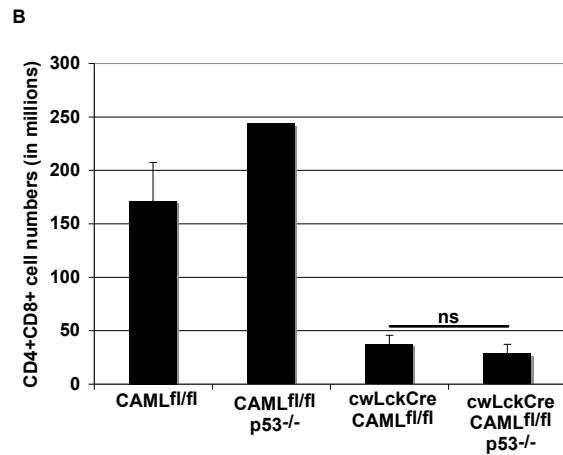

Supplement: NIHMS180163-supplement-1.pdf [file NIHMS180163-supplement-1.pdf]

## Supplementary Figure 2

A

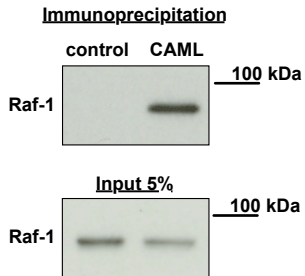

B

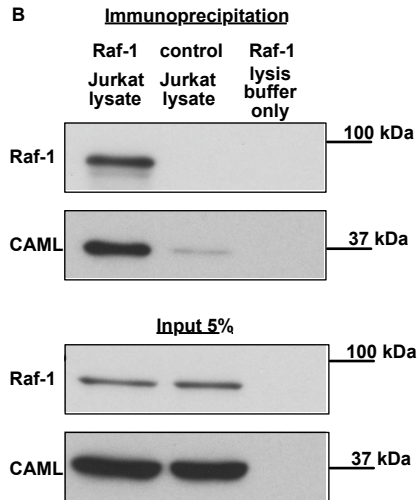

Supplement: NIHMS180163-supplement-2.pdf [file NIHMS180163-supplement-2.pdf]
